# Supplementary material for: Combination Chemotherapy with Cisplatin and Chloroquine: Effect of Encapsulation in Micelles Formed by Self-Assembling Hybrid Dendritic–Linear–Dendritic Block Copolymers
Source: Int J Mol Sci. 2021 May 14;22(10):5223. doi: 10.3390/ijms22105223 (PMC8156097; doi:10.3390/ijms22105223)
Supplement: Supplementary file 1 [file ijms-22-05223-s001.zip › ijms-1199448-supplementary.pdf]

# Combination Chemotherapy with Cisplatin and Chloroquine: Effect of Encapsulation in Micelles formed by Self-Assembling Hybrid Dendritic–Linear–Dendritic Block Copolymers

## Preparation of double encapsulation of CQ and CDDP

HDLDBC-bMPA, CQ and CDDP were dissolved at the same time in a mixture of dichloromethane and distilled water (1:1) at a feeding ratio of (1:1) ( $W_{\text{HDLDBC}}:W_{\text{drug}}$ ) for CQ and at a feeding ratio of (1:0.25) ( $W_{\text{HDLDBC}}:W_{\text{drug}}$ ) for CDDP. The samples were vigorously stirred at room temperature employing an orbital shaker under ventilation until complete evaporation of DCM (around 2 h). The non-encapsulated drugs were removed by dialysis at 4°C (regenerated cellulose membrane, Slide-A-Lyzer devices, MW 1000 Da cut-off, Thermo Scientific) against distilled water (200 mL) during 16 h. The amounts of encapsulated drugs were indirectly determined as described in Manuscript (2.4 *Drug encapsulation in HDLDBC nanoaggregates and releasing profiles*).  $0.63 \pm 0.09$  mg of CQ per mg of HDLDBC-bMPA and  $0.064 \pm 0.052$  mg of CDDP per mg of HDLDBC-bMPA were simultaneously encapsulated according to this protocol, giving encapsulation efficiency of  $63 \pm 9\%$  and  $14 \pm 4\%$  respectively. According to DLS, aggregates showing three size-populations were obtained:  $27 \pm 3$  nm (4 %),  $160 \pm 21$  nm (18 %) and  $640 \pm 109$  nm (79 %).

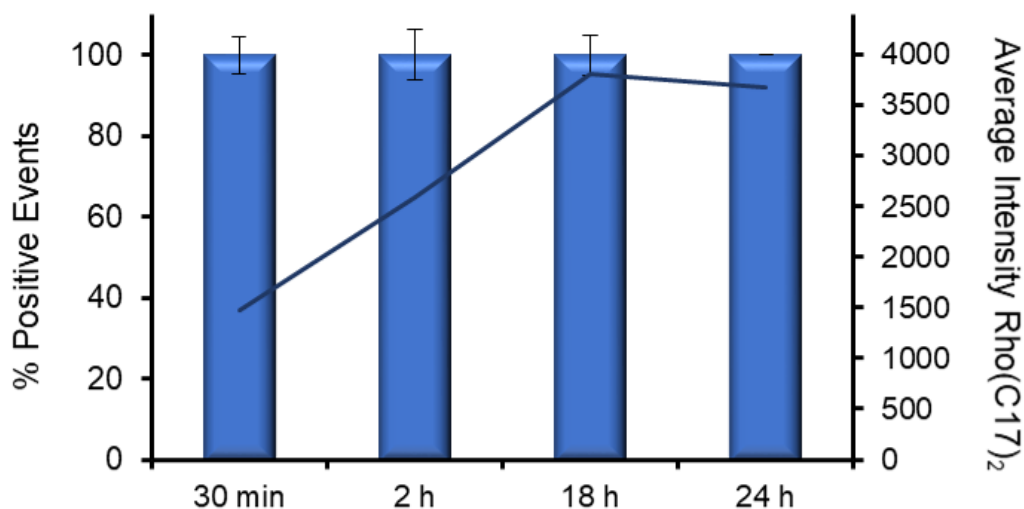

**Figure S1.** Internalization curve of HDLDBC-bGMPA(Rho(C17)<sub>2</sub>) in human fibroblasts (Fdh) as analyzed by flow cytometry. Bars represent the percentage of rhodamine-positive events relative to the total number of events recorded. The line represents the average rhodamine intensity of the population at each time-point.

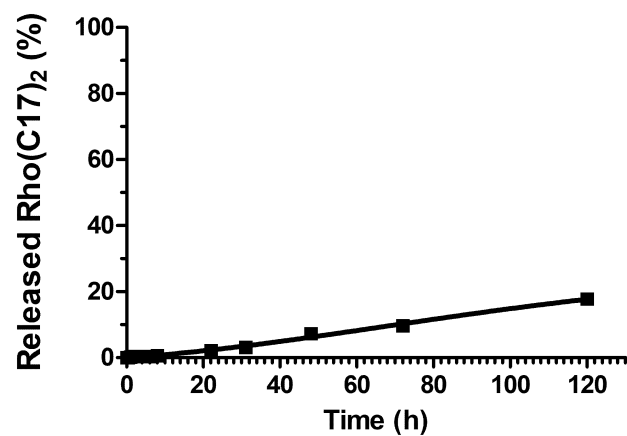

**Figure S2.** Release profile of Rho(C17)<sub>2</sub> from HDLDBC-bMPA at 37 °C. Data is expressed as percentage of total Rho(C17)<sub>2</sub> encapsulated at 0 h.

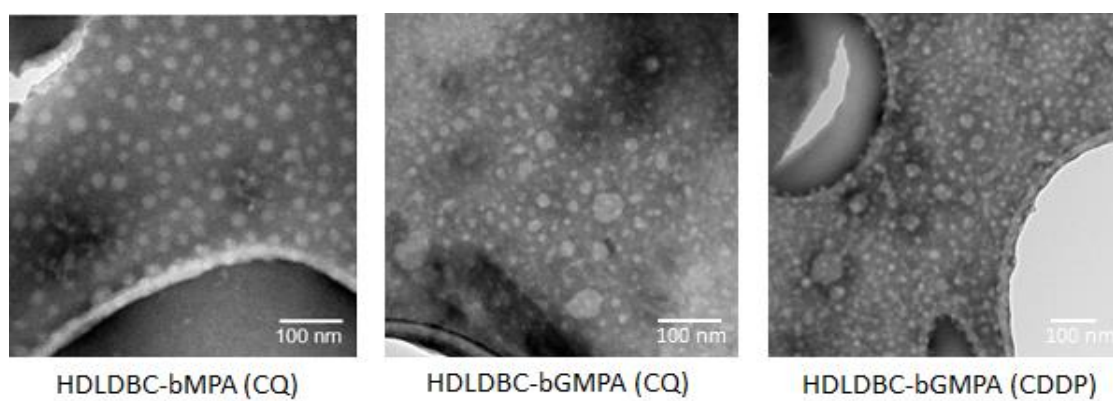

**Figure S3.** TEM images of the encapsulation of CQ and CDDP in HDLDBC-bMPA and HDLDBC-bGMPA.

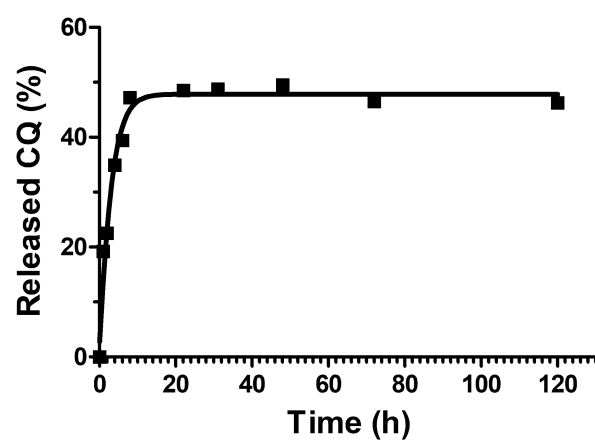

**Figure S4.** Release profile of CQ from HDLDBC-bMPA at 37 °C. Data is expressed as percentage of total CQ encapsulated at 0 h.

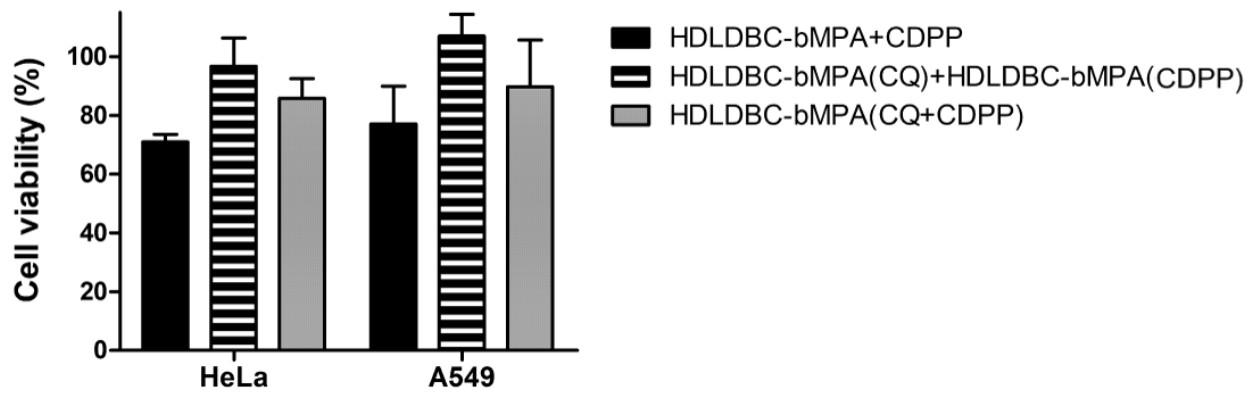

**Figure S5.** Cell viability of HeLa and A549 cells measured after 72 h of a simultaneous treatment with CQ and CDDP either free or encapsulated in HDLDBC-bMPA. Final concentrations used were as follows: HDLDBC-bMPA at 1 mg/mL and free CDDP at 1  $\mu$ g/mL; HDLDBC-bMPA(CQ) at 40  $\mu$ M of CQ and HDLDBC-bMPA(CDDP) at 1  $\mu$ g/mL of CDDP; HDLDBC-bMPA(CQ + CDDP) at 40  $\mu$ M of CQ and 4.4  $\mu$ g/mL of CDDP.

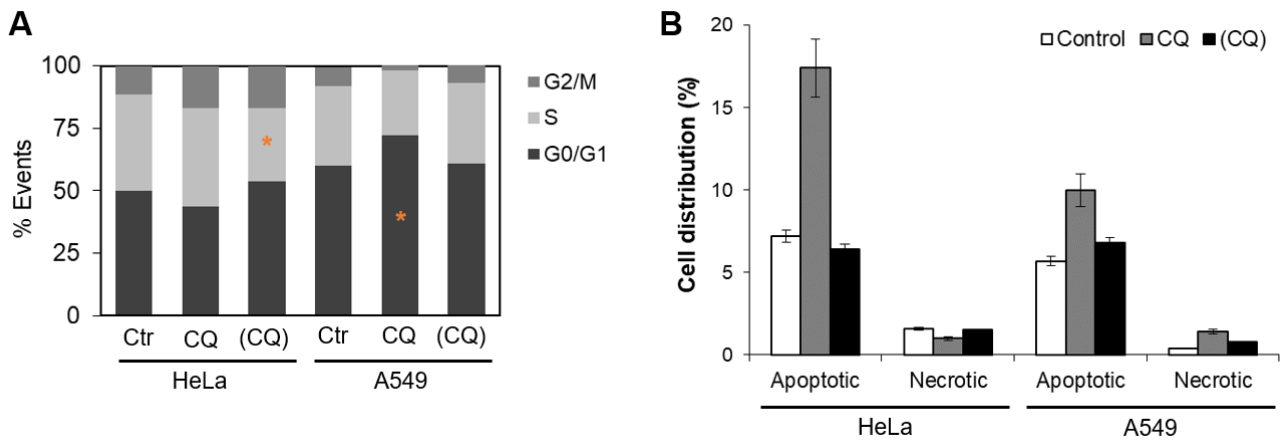

**Figure S6.** (A) Alterations to the cell cycle and (B) induction of apoptosis determined by flow cytometry after pre-treatment of HeLa and A549 cells for 18 h with 40  $\mu$ M of free CQ or CQ encapsulated in HDLDBC-bMPA [(CQ)] (\* indicates alterations >10% compared to control group).
